# Supplementary material for: YAP and TAZ modulate cell phenotype in a subset of small cell lung cancer
Source: PubMed Central journal article supplement — Cancer Sci. 2016 Nov 25;107(12):1755–66. doi: 10.1111/cas.13078 (PMC5198951; doi:10.1111/cas.13078), 2016-11-25
Supplement: CAS-107-1755-s001.pdf [file CAS-107-1755-s001.pdf]

# Figure S1

**A**

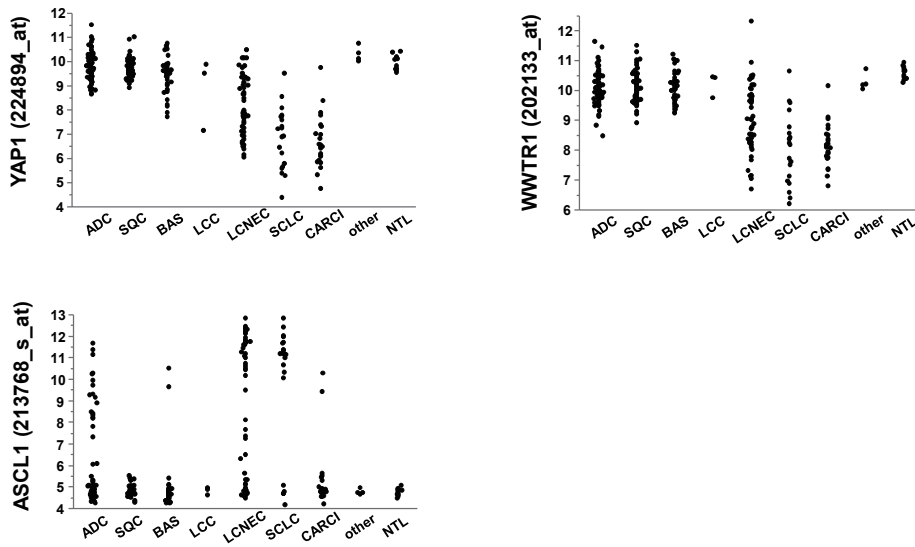

**B**

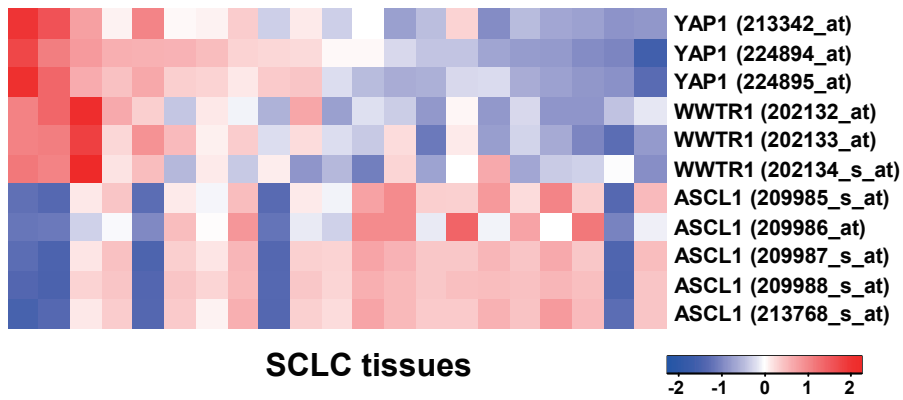

**C**

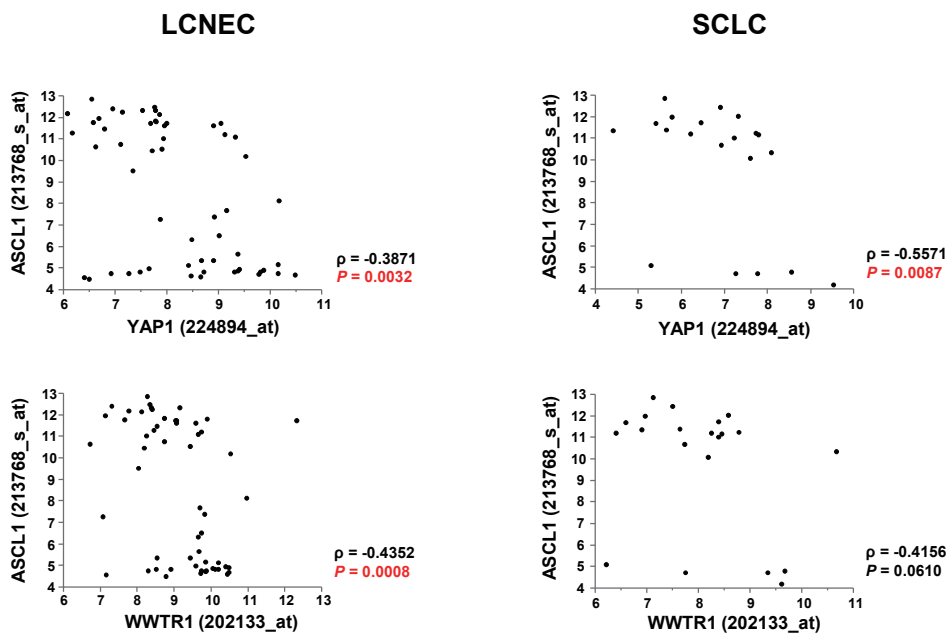

Supplementary Figure S1. Inverse correlation between YAP1, WWTR1 and ASCL1 expression.

A. Expression levels of YAP1 (YAP), WWTR1 (TAZ) and ASCL1 in the GSE30219 microarray data set. Probe ID of each gene is indicated. Different combinations of other probes yielded similar results. ADC: adenocarcinoma (n = 85), SQC: squamous cell carcinoma (n = 61), BAS: basaloid lung cancer (n = 39), LCC: large cell carcinoma (n = 3), LCNEC: large cell neuroendocrine carcinoma (n = 56), SCLC: small cell lung cancer (n = 21), CARCI: carcinoid (n = 24), other: other histology (n = 4), NTL: non tumoral lung (n = 14). B. Heatmap of the Z score showing relative expression levels of YAP1 (YAP), WWTR1 (TAZ) and ASCL1 in SCLC tissue samples in the GSE30219 data set (n = 21). C. Scatter plot showing expression levels of YAP1 (YAP), WWTR1 (TAZ) and ASCL1 in LCNEC (n = 56) and SCLC (n = 21) tissue samples of the GSE30219 data set. Spearman correlation coefficients ( $\rho$ ) and P values are indicated.
