# Supplementary material for: YAP and TAZ modulate cell phenotype in a subset of small cell lung cancer
Source: PubMed Central journal article supplement — Cancer Sci. 2016 Nov 25;107(12):1755–66. doi: 10.1111/cas.13078 (PMC5198951; doi:10.1111/cas.13078), 2016-11-25
Supplement: CAS-107-1755-s002.pdf [file CAS-107-1755-s002.pdf]

# Figure S2

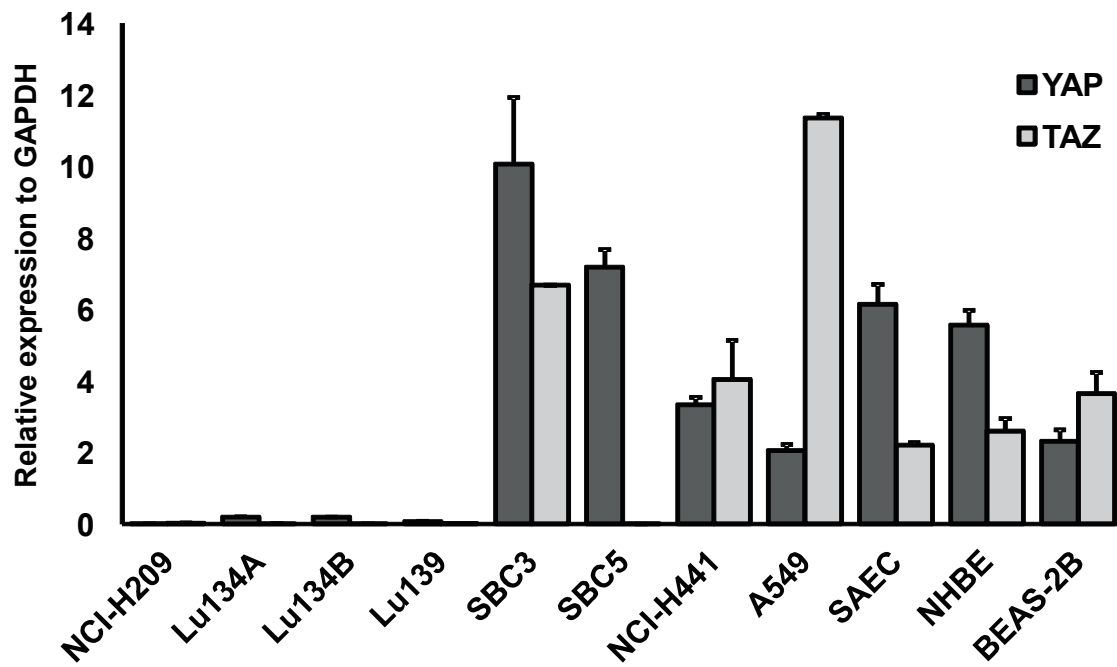

Supplementary Figure S2. YAP and TAZ expression in SCLC cell lines. Quantitative RT-PCR for YAP and TAZ in SCLC cell lines (NCI-H209, Lu134A, Lu134B, Lu139, SBC3 and SBC5), NSCLC cell lines (A549 and NCI-H441) and lung epithelial cells (SAEC, NHBE and BEAS2B). The expression levels were normalized to that of GAPDH. Error bars represent standard errors.
