# Supplementary material for: YAP and TAZ modulate cell phenotype in a subset of small cell lung cancer
Source: PubMed Central journal article supplement — Cancer Sci. 2016 Nov 25;107(12):1755–66. doi: 10.1111/cas.13078 (PMC5198951; doi:10.1111/cas.13078), 2016-11-25
Supplement: CAS-107-1755-s003.pdf [file CAS-107-1755-s003.pdf]

# Figure S3

## A

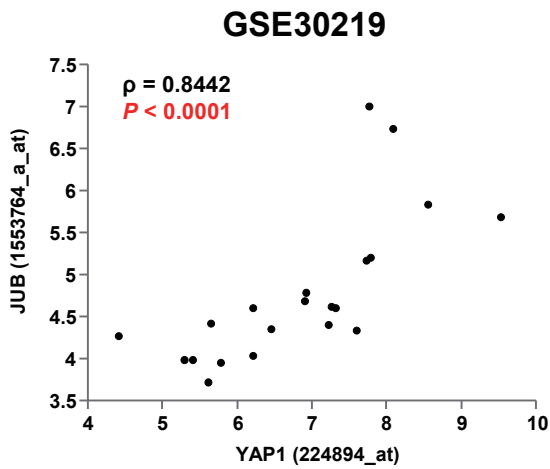

## B

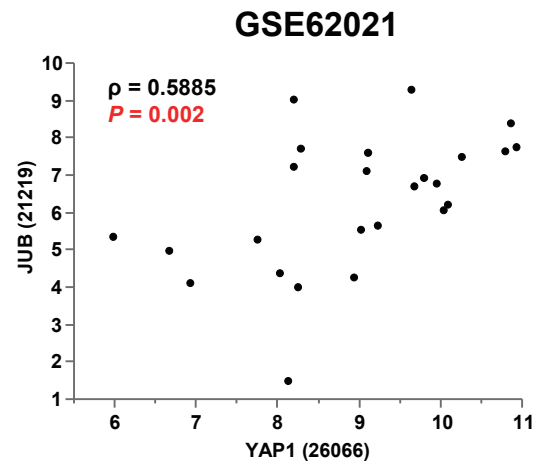

## C

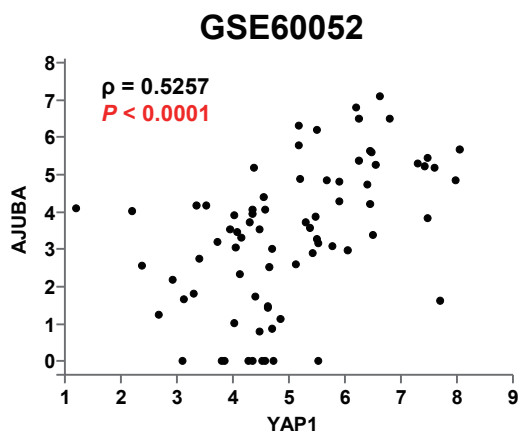

Supplementary Figure S3. Positive correlation between YAP and AJUBA.

A. Scatter plot showing expression levels of YAP1 (YAP) and JUB (AJUBA) in SCLC tissue samples of the GSE30219 microarray data set (n = 21). Probe ID of each gene is indicated. Different combinations of other probes yielded similar results. Spearman correlation coefficients ( $\rho$ ) and P values are shown. B. Scatter plot showing expression levels of YAP (YAP1) and AJUBA (JUB) in SCLC tissue samples of the GSE62021 microarray data set (n = 25). C. Scatter plot showing expression of YAP and AJUBA in SCLC tissue samples of the GSE60052 RNAseq data set (n = 79).
