# Supplementary material for: YAP and TAZ modulate cell phenotype in a subset of small cell lung cancer
Source: PubMed Central journal article supplement — Cancer Sci. 2016 Nov 25;107(12):1755–66. doi: 10.1111/cas.13078 (PMC5198951; doi:10.1111/cas.13078), 2016-11-25
Supplement: CAS-107-1755-s004.pdf [file CAS-107-1755-s004.pdf]

## Figure S4

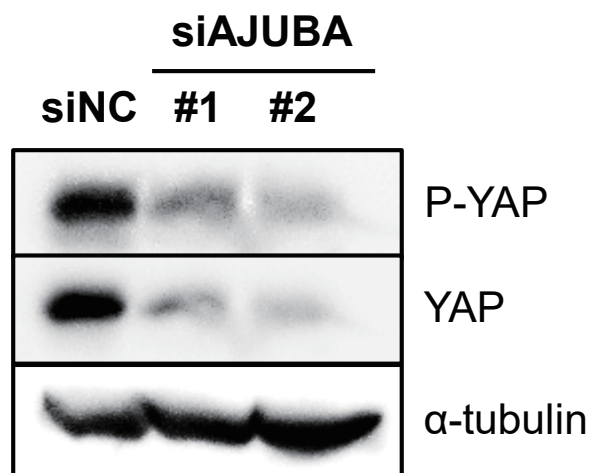

Supplementary Figure S4. Phosphorylation and expression of YAP following AJUBA knockdown in SBC5 cells. Immunoblotting for phosphorylated and total YAP in SBC5 cells treated with control (siNC) or AJUBA siRNA (siAJUBA). Two different siRNAs (#1, #2) were used.
